# Supplementary material for: Curcumin Loaded PEGylated Nanoemulsions Designed for Maintained Antioxidant Effects and Improved Bioavailability: A Pilot Study on Rats
Source: MDPI journal article supplement (doi:10.3390/ijms22157991), 2021-07-26
Supplement: s1 [file s1]

### Supplementary material

**Table S1.** Model confirmation – comparison of predicted and observed values for nanoemulsion droplet size and size distribution

| Factor settings |                      |              |           | Response   | Predicted mean | SE Pred | 95% PI low | 95% PI high | Observed mean $\pm$ SD |
|-----------------|----------------------|--------------|-----------|------------|----------------|---------|------------|-------------|------------------------|
| PEG-PL type     | PEG-PL concentration | HPH pressure | HPH cycle |            |                |         |            |             |                        |
| PEG5000-DPPE    | 0.1%                 | 800 bar      | 10        | Z-ave (nm) | 107.2          | 1.7     | 103.5      | 110.8       | 107.7 $\pm$ 1.1        |
|                 |                      |              |           | PDI        | 0.105          | 0.01    | 0.082      | 0.127       | 0.084 $\pm$ 0.01       |
| PEG2000-DSPE    | 0.1%                 | 800 bar      | 10        | Z-ave (nm) | 110.2          | 1.8     | 106.3      | 114.1       | 106.9 $\pm$ 0.8        |
|                 |                      |              |           | PDI        | 0.105          | 0.01    | 0.083      | 0.127       | 0.085 $\pm$ 0.013      |
| PEG5000-DPPE    | 0.3%                 | 800 bar      | 10        | Z-ave (nm) | 108.6          | 1.6     | 105.2      | 112.1       | 109.4 $\pm$ 0.8        |
|                 |                      |              |           | PDI        | 0.123          | 0.01    | 0.101      | 0.144       | 0.102 $\pm$ 0.009      |

SE: standard error; PI: predicted interval; SD: standard deviation.

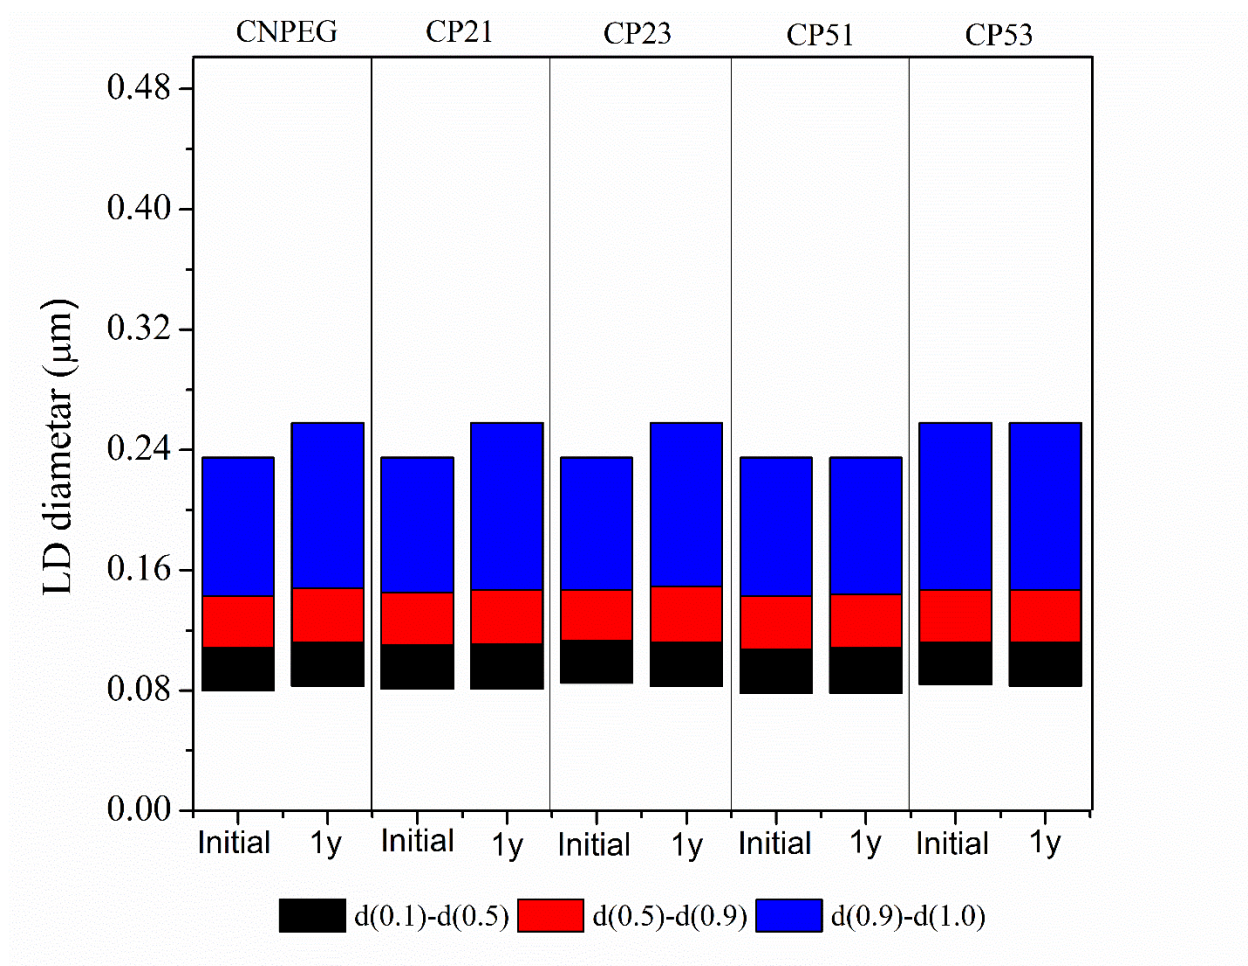

**Figure S1.** Droplet size of curcumin loaded formulations measured by laser diffraction (LD) initially and after 1 year of storage at room temperature

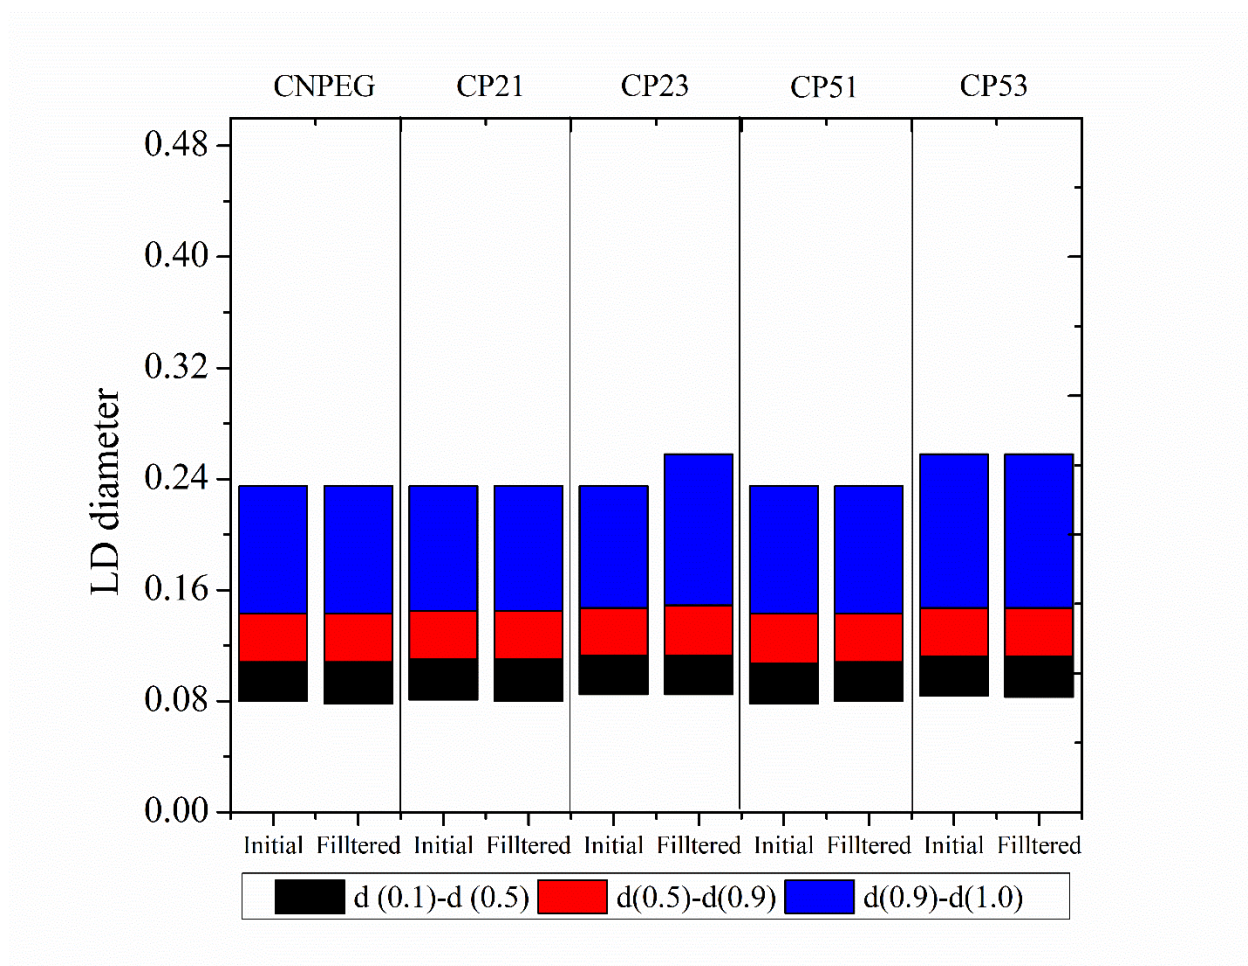

**Figure S2.** Droplet size of curcumin loaded formulations measured by laser diffraction (LD) initially and after aseptic filtration

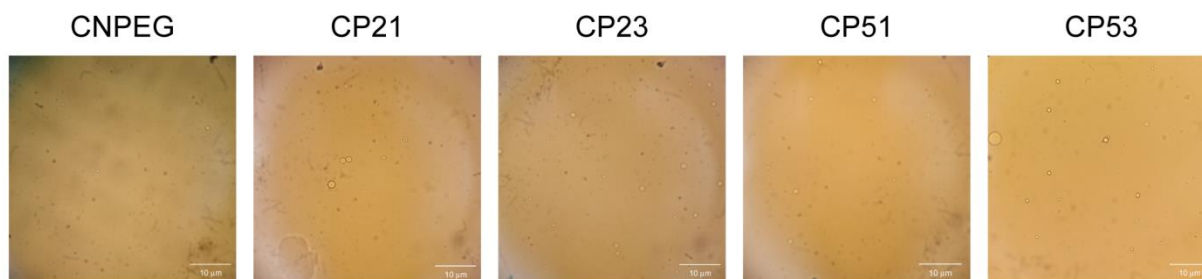

**Figure S3.** Curcumin-loaded NEs as observed under optical microscope after two years of storage. All micrographs were taken under 1000x magnification

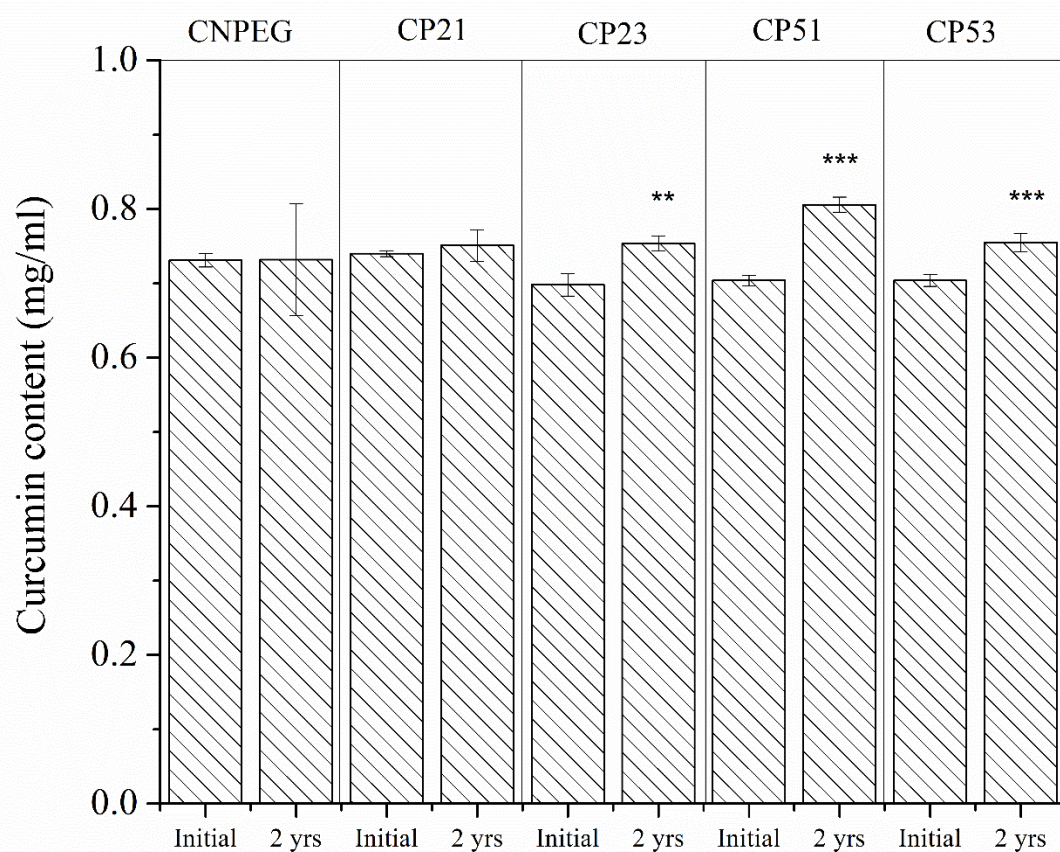

**Figure S4.** Curcumin content in formulations (mg/ml) measured initially and after two years of storage; Values are shown as means  $\pm$  sd (n = 3); \*, \*\* and \*\*\*, p<0.05; p<0.01 and p<0.001 compared to the initial values



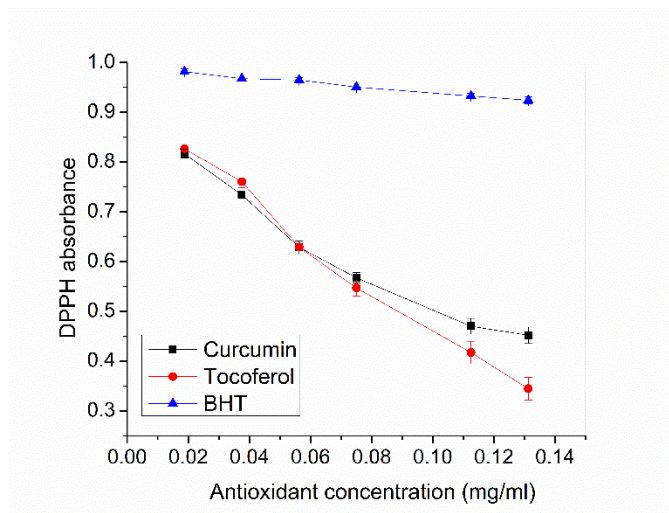

(a)

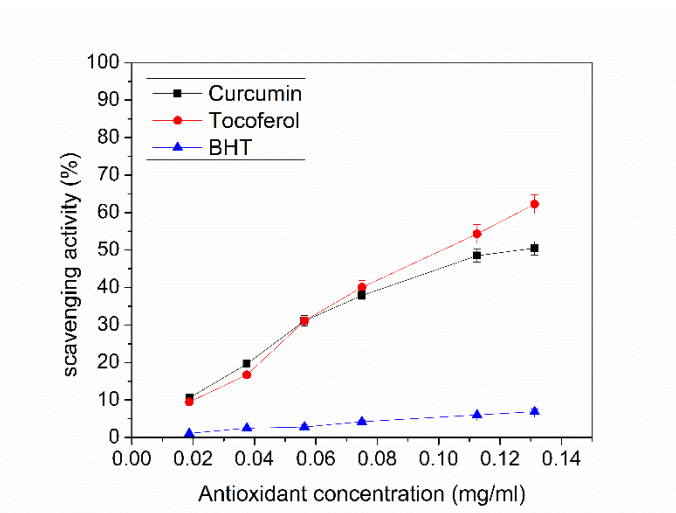

(b)

**Figure S5.** (a) DPPH absorbance measured after exposure to different antioxidants; (b) corresponding free radical scavenging activity as the function of antioxidant concentration; Values are shown as means  $\pm$  sd (n = 3)

**Table S2.** *In vitro* release kinetic data of curcumin from the investigated nanoemulsions

| Kinetic model    | Parameter                          | Nanoemulsion formulation |                |                |                |                |
|------------------|------------------------------------|--------------------------|----------------|----------------|----------------|----------------|
|                  |                                    | CNPEG                    | CP21           | CP23           | CP51           | CP53           |
| Zero-order       | K                                  | 0.2100                   | <b>0.1386</b>  | <b>0.1881</b>  | <b>0.2064</b>  | <b>0.2294</b>  |
|                  | R <sup>2</sup>                     | 0.9784                   | <b>0.9388</b>  | <b>0.9656</b>  | <b>0.9670</b>  | <b>0.9711</b>  |
|                  | R <sup>2</sup> <sub>adjusted</sub> | 0.9784                   | <b>0.9388</b>  | <b>0.9656</b>  | <b>0.9670</b>  | <b>0.9711</b>  |
|                  | AIC                                | 19.8022                  | <b>21.7451</b> | <b>22.2229</b> | <b>22.6885</b> | <b>23.9795</b> |
| First-order      | K                                  | 0.0025                   | 0.0016         | 0.0023         | 0.0025         | 0.0029         |
|                  | R <sup>2</sup>                     | 0.9804                   | 0.9263         | 0.9402         | 0.9600         | 0.9378         |
|                  | R <sup>2</sup> <sub>adjusted</sub> | 0.9804                   | 0.9263         | 0.9402         | 0.9600         | 0.9378         |
|                  | AIC                                | 19.4865                  | 22.7199        | 25.5555        | 24.2437        | 28.3969        |
| Higuchi          | K                                  | 2.2064                   | 1.3987         | 1.8956         | 2.1276         | 2.3119         |
|                  | R <sup>2</sup>                     | 0.8274                   | 0.7047         | 0.7168         | 0.7695         | 0.7210         |
|                  | R <sup>2</sup> <sub>adjusted</sub> | 0.8274                   | 0.7047         | 0.7168         | 0.7695         | 0.7210         |
|                  | AIC                                | 32.5210                  | 31.9964        | 35.4076        | 34.7768        | 37.7045        |
| Baker–Lonsdale   | K                                  | 0.0002                   | 0.0001         | 0.0001         | 0.0002         | 0.0002         |
|                  | R <sup>2</sup>                     | 0.6206                   | 0.4166         | 0.3697         | 0.5346         | 0.3601         |
|                  | R <sup>2</sup> <sub>adjusted</sub> | 0.6206                   | 0.4166         | 0.3697         | 0.5346         | 0.3601         |
|                  | AIC                                | 37.2116                  | 36.0487        | 40.1841        | 38.9333        | 42.6476        |
| Korsmeyer–Peppas | K                                  | 0.0272                   | 0.0392         | 0.001          | 0.0337         | 0.0179         |
|                  | N                                  | 1.4866                   | 1.2867         | 1.6296         | 1.3817         | 1.5398         |
|                  | R <sup>2</sup>                     | 0.4218                   | 0.9148         | 0.8314         | 0.9405         | 0.9686         |
|                  | R <sup>2</sup> <sub>adjusted</sub> | 0.2772                   | 0.8935         | 0.7893         | 0.8806         | 0.9607         |
|                  | AIC                                | 40.8994                  | 26.4862        | 32.7895        | 30.1642        | 23.9326        |
| Hixson Crowel    | K                                  | <b>0.0008</b>            | 0.0005         | 0.0007         | 0.0008         | 0.0008         |
|                  | R <sup>2</sup>                     | <b>0.9814</b>            | 0.9312         | 0.9502         | 0.9641         | 0.9641         |
|                  | R <sup>2</sup> <sub>adjusted</sub> | <b>0.9814</b>            | 0.9312         | 0.9502         | 0.9641         | 0.9641         |
|                  | AIC                                | <b>19.1794</b>           | 22.3467        | 24.4452        | 23.5250        | 23.5250        |

K, release rate constant; R<sup>2</sup>, coefficient of determination; R<sup>2</sup><sub>adjusted</sub>, adjusted coefficient of determination; AIC, Akaike Information Criterion; n, diffusion release exponent ( $n \leq 0.43$  – Fick diffusion;  $0.43 < n < 0.85$  – anomalous transport, non-Fickian diffusion;  $n \geq 0.85$  – zero order release);
